# Supplementary material for: Mutations and altered expression of SERPINF1 in patients with familial otosclerosis
Source: PubMed Central journal article supplement (PMC5181625; doi:10.1093/hmg/ddw106), 2016-04-07
Supplement: supp_ddw106_HMG-2016-D-00169_Ziff_Supplemental_Data.pdf [file supp_ddw106_HMG-2016-D-00169_Ziff_Supplemental_Data.pdf]

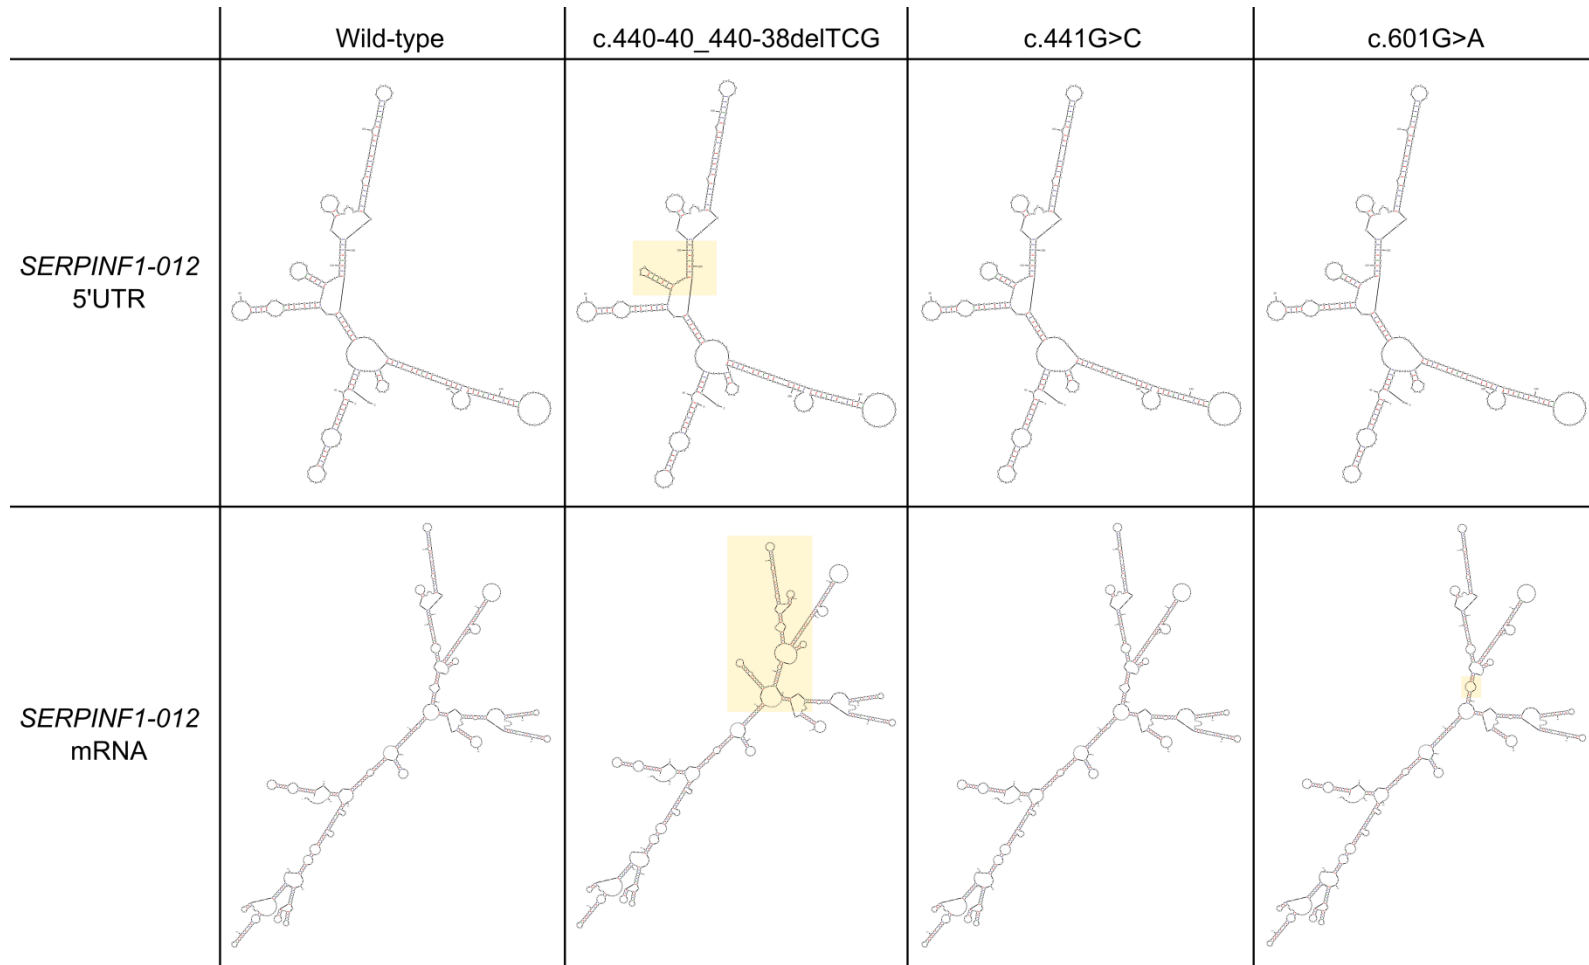

**Figure S1. Predicted *SERPINF1-012* RNA foldings of 5'UTR variants.** Putative RNA folding structures were predicted for the 5'UTR sequences only and the entire *SERPINF1-012* transcript (ENST00000573763). Comparisons were made between wild-type, c.440-40\_440-38delTCG, c.441G>C and c.601G>A. Differences in mRNA structure compared to wild-type are highlighted (yellow box).

**Table S1. PCR primers used to amplify *SERPINF1* exons for sequencing.**

| Primer          | Direction | Gene            | Sequence (5' to 3')    | Amplicon |
|-----------------|-----------|-----------------|------------------------|----------|
| SERPINF1Exon2F  | Forward   | <i>SERPINF1</i> | AGTGACTAGCCCTGCCCAAC   | 309 bp   |
| SERPINF1Exon2R  | Reverse   |                 | AAGCCTGGCCTGGAACCT     |          |
| SERPINF1Exon3F  | Forward   | <i>SERPINF1</i> | CGTGAGGAGACAGTCCCTGT   | 345 bp   |
| SERPINF1Exon3R  | Reverse   |                 | TCAGCCACGTTTACGCAGAGG  |          |
| SERPINF1Exon4F  | Forward   | <i>SERPINF1</i> | GCCTACTTGGGCTCTCAGCAGA | 311 bp   |
| SERPINF1Exon4R  | Reverse   |                 | ACATGCCTCAGGCAACTTGG   |          |
| SERPINF1Exon5F  | Forward   | <i>SERPINF1</i> | TGCTGAGCGCTAAACCAGAAC  | 323 bp   |
| SERPINF1Exon5R  | Reverse   |                 | AGAATTGGAGACGCGCTCACC  |          |
| SERPINF1Exon5bF | Forward   | <i>SERPINF1</i> | AGATGCTGGCTGGGAAGTCAG  | 440 bp   |
| SERPINF1Exon5bR | Reverse   |                 | CTGAGATCGCACCCTGCACTC  |          |
| SERPINF1Exon6F  | Forward   | <i>SERPINF1</i> | CTGACAGCTAAGCTCCCTTGA  | 369 bp   |
| SERPINF1Exon6R  | Reverse   |                 | TGTAGACAGCTGTCGGATCTCA |          |
| SERPINF1Exon7F  | Forward   | <i>SERPINF1</i> | CTGGATGAAGGACGAGACCA   | 420 bp   |
| SERPINF1Exon7R  | Reverse   |                 | AGCCCTTGCGTTCTGCTTAGC  |          |

**Table S2. PCR primers used to amplify *SERPINF1* fragments and pGL4.10 construct for Gibson Assembly.** Underlined sequences represent the overlapping region with the pGL4.10 vector nucleotides. Double underlined sequences represent the overlapping region with the *SERPINF1*-012 transcript nucleotides. Dotted underline indicates the c.601G>A variant in the additional primers.

| Primer                | Sequence (5' to 3')                                           | Template                  | Amplicon |
|-----------------------|---------------------------------------------------------------|---------------------------|----------|
| SERPINF1-012.FOR      | <u>GTACTGTTGGTAAAGCCACCGTCTCGCTCTGTTGCCAG</u>                 | <i>SERPINF1</i> -012 gDNA | 811 bp   |
| SERPINF1-012.REV      | <u>TTAATGTTTTTGGCATCTTCTGCTGATCTCATCGGAATTCCTTGT</u>          |                           |          |
| pGL4-10.FOR           | <u>AATCCCGATGAGATCAGCAGAAGATGCCAAAAACATTAAGAAGGGC</u>         | pGL4.10                   | 4279 bp  |
| pGL4-10.REV           | <u>CCTGGGCAACAGAGCGAGACGGTGGCTTACCAACAGTACCG</u>              |                           |          |
| SERPINF1-012_601A.REV | <u>TTAATGTTTTTGGCATCTTCTGCTGATCTCAT</u> <u>GGGAATTCCTTGT</u>  | <i>SERPINF1</i> -012 gDNA | 811 bp   |
| pGL4-10_601A.FOR      | <u>AATCCCA</u> <u>ATGAGATCAGCAGAAGATGCCAAAAACATTAAGAAGGGC</u> | pGL4.10                   | 4279 bp  |

**Table S3. List of candidate genes and identified variants prioritised for followed-up in four families with otosclerosis.**

| Family | Gene            | Variant           | Segregated |
|--------|-----------------|-------------------|------------|
| A      | <i>DNAH5</i>    | c.7883T>G         | N          |
|        | <i>FRYL</i>     | c.227G>T          | N          |
|        | <i>PTK6</i>     | c.652A>T          | N          |
|        | <i>SMAP1</i>    | c.1224_1226dupCAT | N          |
| B      | <i>ACE</i>      | c.3304C>A         | N          |
|        | <i>ANKS1A</i>   | c.1291C>A         | Y          |
|        | <i>CYP2D6</i>   | c.345delC         | N          |
|        | <i>HHIPL2</i>   | c.1300G>A         | N          |
|        | <i>LEPRE1</i>   | c.1626G>A         | N          |
|        | <i>MIA3</i>     | c.707G>A          | N          |
|        | <i>SERPINF1</i> | c.601G>A          | Y          |
|        | <i>VPS53</i>    | c.107C>G          | Y          |
| C      | <i>EGLN3</i>    | c.496C>T          | N          |
|        | <i>ERCC6</i>    | c.2913G>C         | N          |
|        | <i>PDLIM5</i>   | c.842G>A          | N          |
|        | <i>TRIM17</i>   | c.915C>G          | Y          |
| D      | <i>COLIA2</i>   | c.808G>A          | Y          |
|        | <i>FOXK1</i>    | c.1384G>A         | N          |
|        | <i>FZD2</i>     | c.655C>T          | Y          |
|        | <i>GNGT1</i>    | c.82C>A           | Y          |
|        | <i>mir183</i>   | n.81G>T           | Y          |
|        | <i>SHANK2</i>   | c.2171C>T         | N          |
|        | <i>ZNF225</i>   | c.1698A>T         | Y          |

**Table S4. Predicted transcription factor binding sites in *SERPINF1-012* 5'UTR variants.**

| Nucleotide change     | Transcription Factor | <i>SERPINF1-012</i> |            | Relevance                                              |
|-----------------------|----------------------|---------------------|------------|--------------------------------------------------------|
|                       |                      | Wild-type           | Mutant     |                                                        |
| c.440-40_440-38delTCG | PAX3                 | no binding          | 0.808      | Regulates BMP-induced osteogenesis <sup>36</sup>       |
| c.441G>C              | HOXA9                | 0.855               | 0.855      |                                                        |
| c.601G>A              | NFKB1                | 0.933               | 0.933      |                                                        |
|                       | DEAF1                | 0.907               | no binding |                                                        |
|                       | POU3F2               | no binding          | 0.866      |                                                        |
|                       | IKZF1                | 0.936               | 0.993      |                                                        |
|                       | RBPJ                 | no binding          | 0.951      | Regulates osteoclastogenesis <sup>37</sup>             |
|                       | HESX1                | 0.721               | 0.803      |                                                        |
|                       | HMGA1                | 0.968               | 0.929      |                                                        |
|                       | PRDM16               | 0.990               | no binding |                                                        |
|                       | NFYA                 | no binding          | 0.936      | Mediates regulation of bone sialoprotein <sup>38</sup> |
|                       | MAFK                 | 0.853               | 0.853      |                                                        |
|                       | CPHX                 | 0.846               | no binding |                                                        |
